# Supplementary material for: Preparation of a cobalt mono-substituted silicotungstic acid doped with aniline for the selective adsorption of ovalbumin
Source: Royal Society of Chemistry journal article supplement (doi:10.1039/c5tb00544b), 2015-01-01
Supplement: c5tb00544b1.pdf [file c5tb00544b1.pdf]

## **Supplementary Information**

### **Preparation of Cobalt Mono-substituted Silicotungstic Acid Doped with Aniline for the Selective Adsorption of Ovalbumin**

Dan-Dan Zhang<sup>a</sup>, Qing Chen<sup>a</sup>, Lin-Lin Hu<sup>a</sup>, Xu-Wei Chen<sup>\*a</sup> and Jian-Hua Wang<sup>\*a,b</sup>

<sup>a</sup> Research Center for Analytical Sciences, College of Sciences, Northeastern University, Shenyang 110819, China

<sup>b</sup> Collaborative Innovation Center of Chemical Science and Engineering, Tianjin 300071, China

SDS-PAGE assay results for the Ova/BSA mixture before and after adsorption by the  $\text{SiW}_{11}\text{Co/PANI}$  composite, Ova and BSA standard solutions, and Ova recovered from the composite with elution by phosphate ( $0.1 \text{ mol L}^{-1}$ , pH 5.6), as illustrated in Figure S1 clearly shown obvious adsorption of Ova, while at the same time the adsorption of BSA is virtually not observed. In addition, significant amount of Ova is recovered from the composite by elution with phosphate buffer, while no BSA is recovered at all. These observations clearly demonstrated the selectivity of adsorption to Ova against BSA.

The SDS-PAGE bands for Ova and BSA are shown in 44.3 kDa (Ova) and 66.4 kDa (BSA) respectively.

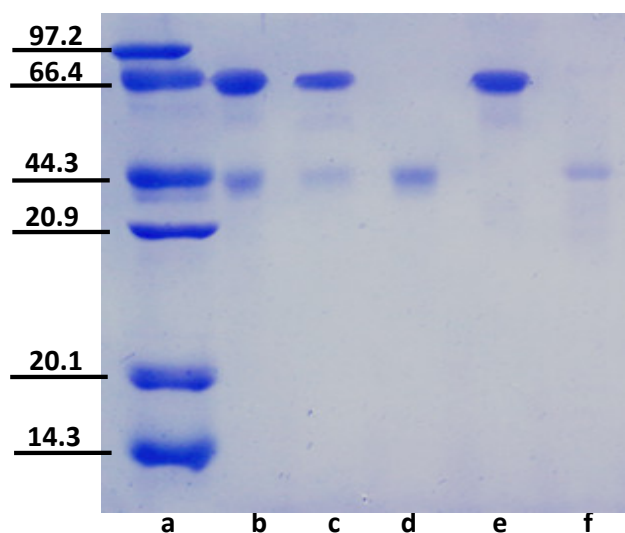

Figure S1. SDS-PAGE assay results for the Ova/BSA mixture before and after adsorption by the  $\text{SiW}_{11}\text{Co/PANI}$  composite, Ova and BSA standard solutions, and Ova recovered from the composite with elution by phosphate ( $0.1 \text{ mol L}^{-1}$ , pH 5.6).
